- tricyclic antidepressant tianeptine. *J Anal Toxicol* 2017; 41:547–50
28. Kisa C, Bulbul D, Aydemir C, Goka E: Is it possible to be dependent on tianeptine, an antidepressant? A case report. *Progr Neuro-psychopharmacol Biol Psychiatry* 2007; 31:776–8
  29. Saatçioğlu Ö, Rahşan F, Çakmak D: Abuse of tianeptine: A case report. *Türk Psikiyatri Dergisi* 2006; 17:1–4
  30. Boon M, van Dorp E, Broens S, Overdyk F: Combining opioids and benzodiazepines: Effects on mortality and severe respiratory depression. *Ann Pall Med* 2020; 9:542–57
  31. Ren J, Ding X, Funk GD, Greer JJ: Ampakine CX717 protects against fentanyl-induced respiratory depression and lethal apnea in rats. *ANESTHESIOLOGY* 2009; 110:1364–70

## ANESTHESIOLOGY REFLECTIONS FROM THE WOOD LIBRARY-MUSEUM

### The Leech Airway: A Flute for Your “Champagne”?

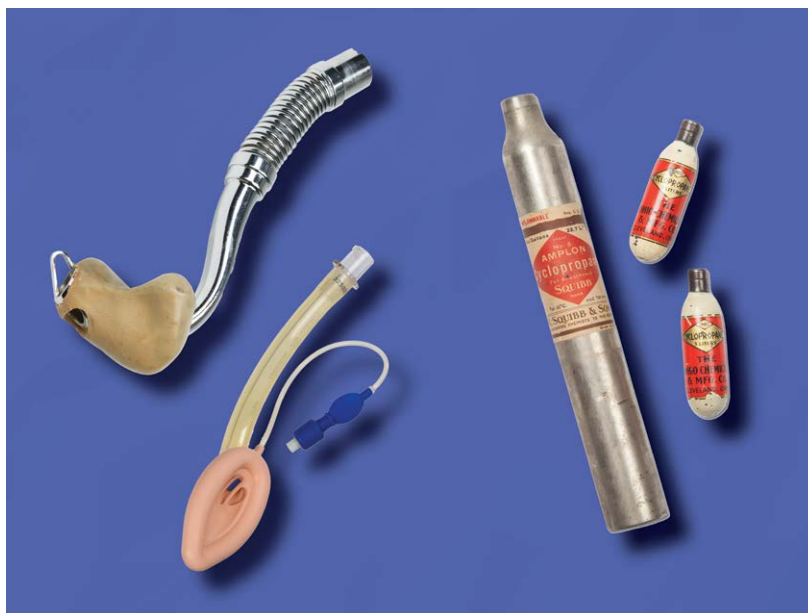

In 1937, Canadian anesthesiologist Beverley Leech, M.D. (1898 to 1960), patented an early precursor to the laryngeal mask airway (LMA, *lower left*). His “pharyngeal bulb gasway,” also called the Leech airway, featured a soft, detachable rubber bulb around a tough metal core (*upper left*). Leech’s love for cyclopropane (*right*), dubbed the “champagne” of volatile anesthetics, inspired the airway’s design. Although rapid and smooth in onset, cyclopropane was expensive and explosive, mandating closed-circuit delivery. However, leak-free ventilation was challenging to achieve, as endotracheal intubation had yet to become routine. Laryngoscopes and tubes were still being refined, and prolonged laryngospasm easily occurred pre-curare. To avoid the risk of intubation, Leech envisioned a supraglottic airway that would optimize cyclopropane delivery through a closed circuit. For more than a year, he painstakingly examined the wax casts of cadaver throats to design a malleable bulb that conformed to the average adult pharynx. Once manufactured, the Leech airway gained favor. Its bulb, lubricated with Vaseline, could be advanced gently into the oropharynx of a mask-induced patient. However, when succinylcholine arrived in 1952, wondrously facilitating tracheal intubation, the Leech airway became obsolete. (Copyright © the American Society of Anesthesiologists’ Wood Library-Museum of Anesthesiology. [www.woodlibrarymuseum.org](http://www.woodlibrarymuseum.org))

Jane S. Moon, M.D., Assistant Clinical Professor, Department of Anesthesiology and Perioperative Medicine, University of California, Los Angeles, California.
